# Supplementary material for: MiR-34a-5p and miR-452-5p: The Novel Regulators of Pancreatic Endocrine Dysfunction in Diabetic Zucker Rats?
Source: PubMed Central journal article supplement (PMC8364455; doi:10.7150/ijms.62843), 2021-07-11
Supplement: ijmsv18p3171s1.pdf [file ijmsv18p3171s1.pdf]

Table S1. Effect of HFD-feed on body weights in ZDF rats.

| Group   | n | Week 0 (g)      | Week 1 (g)      | Week 2 (g)      | Week 3 (g)      | Week 4 (g)      |
|---------|---|-----------------|-----------------|-----------------|-----------------|-----------------|
| Control | 5 | 266.67±5.74     | 280.30±6.46     | 295.10±6.15     | 320.41±6.83     | 331.20±9.11     |
| Model   | 5 | 354.03±11.42*** | 383.12±32.31*** | 398.74±35.01*** | 428.75±54.75*** | 435.10±63.48*** |

**Table S1.** Effect of HFD-feed on body weights in ZDF rats. Data are represented as mean ± SD. Statistically significant between control group and experimental group were indicated by \*\*\*P<0.001.

Table S2. Effect of HFD-feed on fasting glucose in ZDF rats.

| Group   | n | Week 0 (mmol/L) | Week 1 (mmol/L) | Week 2 (mmol/L) | Week 3 (mmol/L) | Week 4 (mmol/L) |
|---------|---|-----------------|-----------------|-----------------|-----------------|-----------------|
| Control | 5 | 3.32±0.15       | 3.30±0.32       | 3.58±0.25       | 3.30±0.09       | 3.62±0.16       |
| Model   | 5 | 14.82±2.50***   | 17.80±2.69***   | 19.20±5.47***   | 22.56±3.77***   | 25.66±2.85***   |

**Table S2.** Effect of HFD-feed on fasting glucose in ZDF rats. Data are represented as mean ± SD. Statistically significant between control group and experimental group were indicated by \*\*\*P<0.001.

Table S3. Primer sequences of qRT-PCR assay

| Gene       |                  | Primer sequences                                              |
|------------|------------------|---------------------------------------------------------------|
| miR-34a-5p | Stem loop primer | 5'-GTCGTATCCAGTGC GTGTCGTGGAGTCGGCAATTGCACTGGATACGACGCAGTG-3' |
|            | Forward primer   | 5'-CGTCCACAACCAGCTAAGA-3'                                     |
|            | Reverse primer   | 5'-GCAGGGTCCGAGGTATTC-3'                                      |
| miR-452-5p | Stem loop primer | 5'-GTCGTATCCAGTGC GTGTCGTGGAGTCGGCAATTGCACTGGATACGACTGCAGA-3' |
|            | Forward primer   | 5'-CGGCCTCAGTTTCCTCTGCA-3'                                    |
|            | Reverse primer   | 5'-GCAGGGTCCGAGGTATTC-3'                                      |
| U6         | Forward primer   | 5'-CTCGCTTCGGCAGCACATATACT-3'                                 |
|            | Reverse primer   | 5'-ACGCTTCACGAATTTGCGTGTC-3'                                  |

**Table S3.** Primer sequences of qRT-PCR assay. MiR-34a-5p and miR-452-5p both use

special stem-loop primers at reverse transcription, and U6 is the internal reference gene.
